# Supplementary material for: The DyP-type peroxidase DtpA is a Tat-substrate required for GlxA maturation and morphogenesis in Streptomyces
Source: PubMed Central journal article supplement (PMC4736821; doi:10.1098/rsob.150149), 2016-01-06

Figure S1

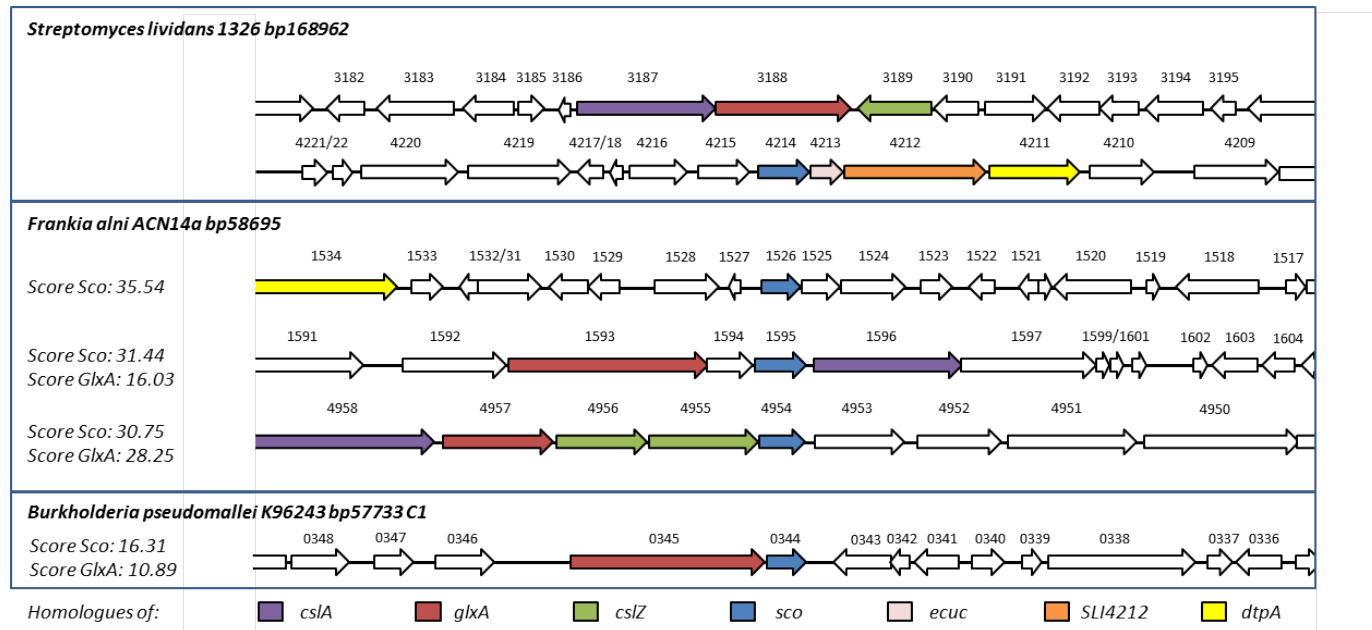

**Figure S2**

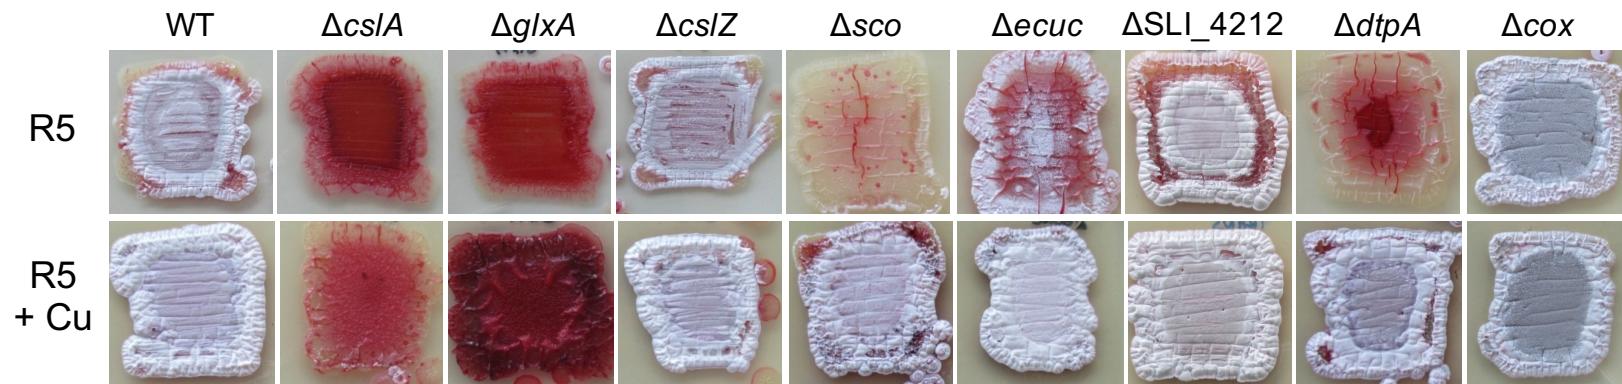

Figure S3

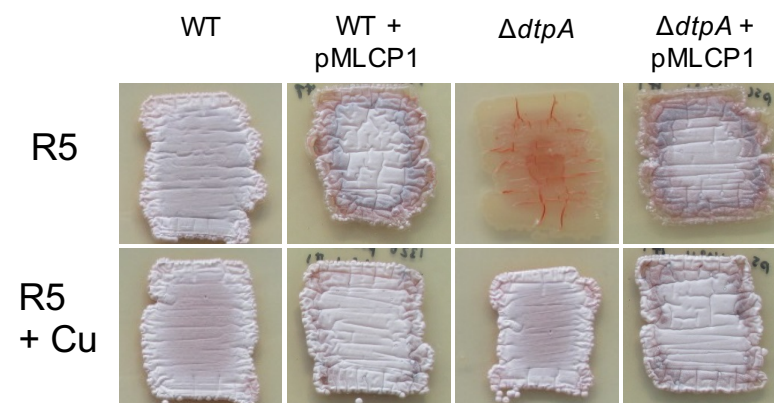

**Figure S4**

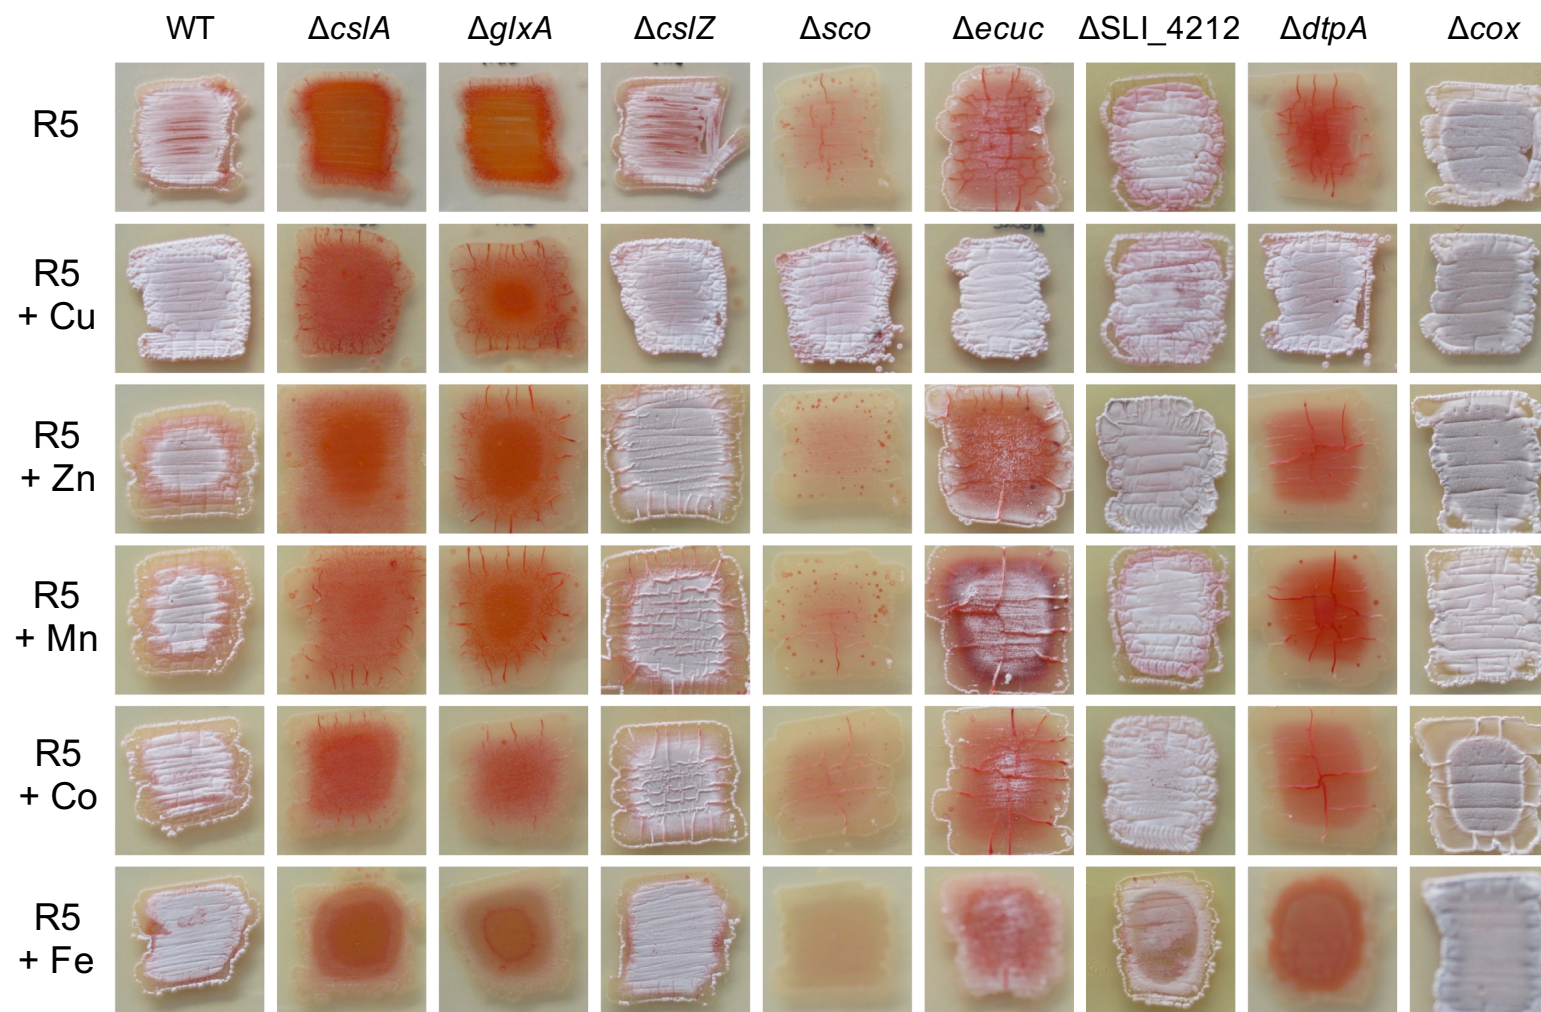

**Figure S5**

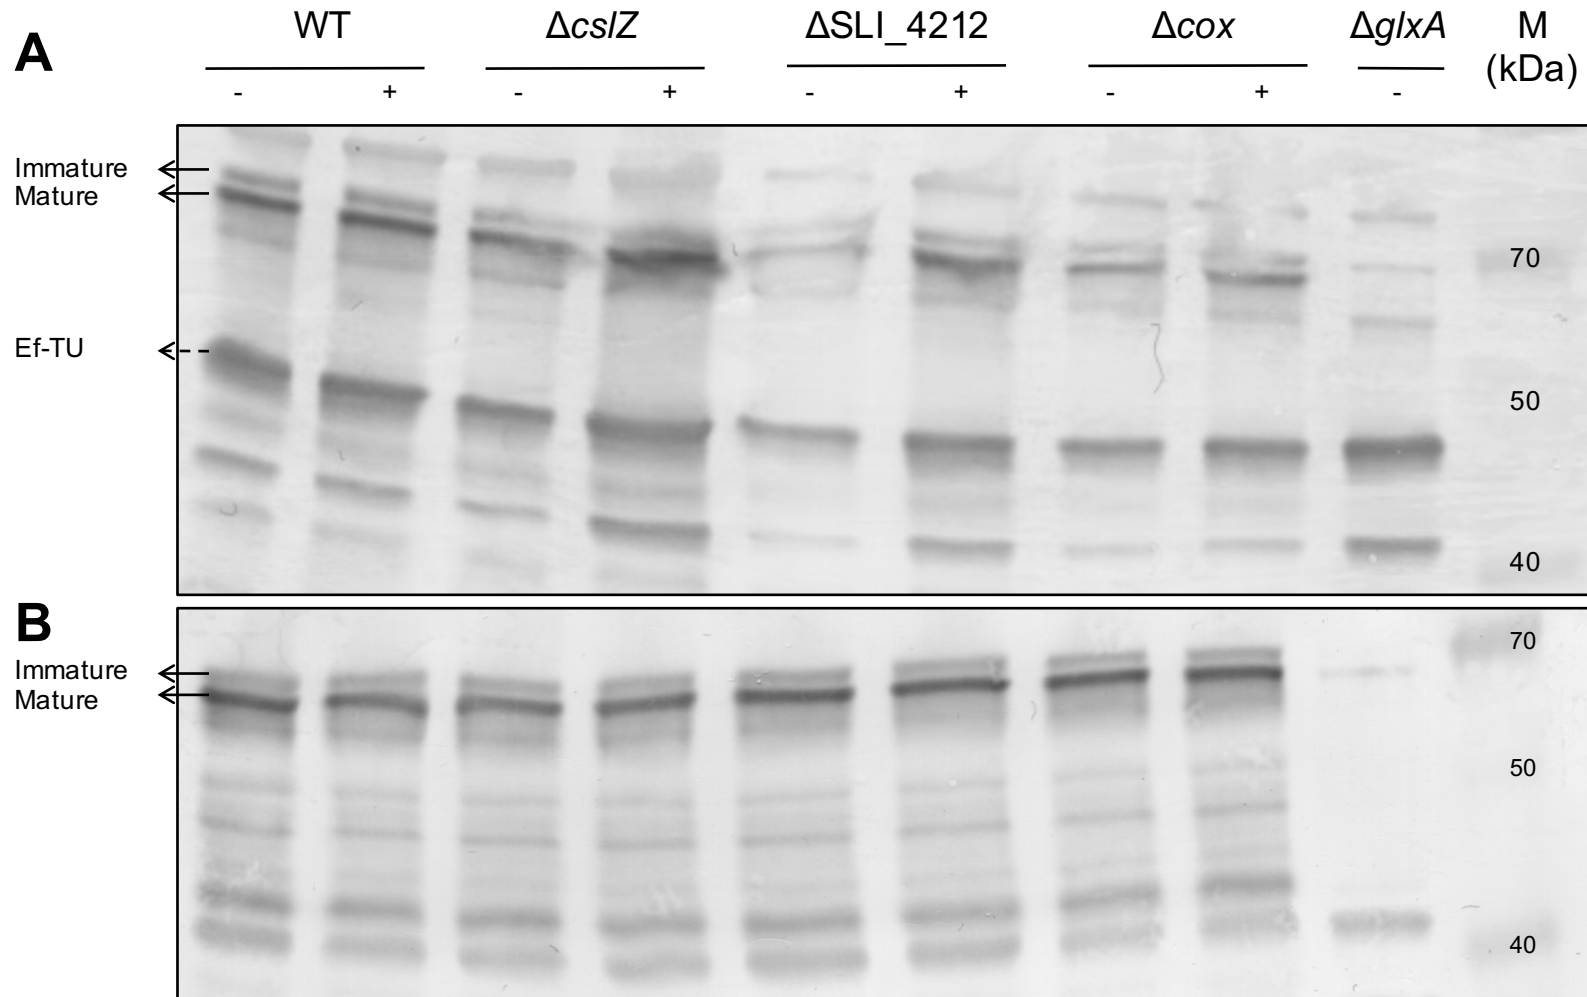

**Figure S6**

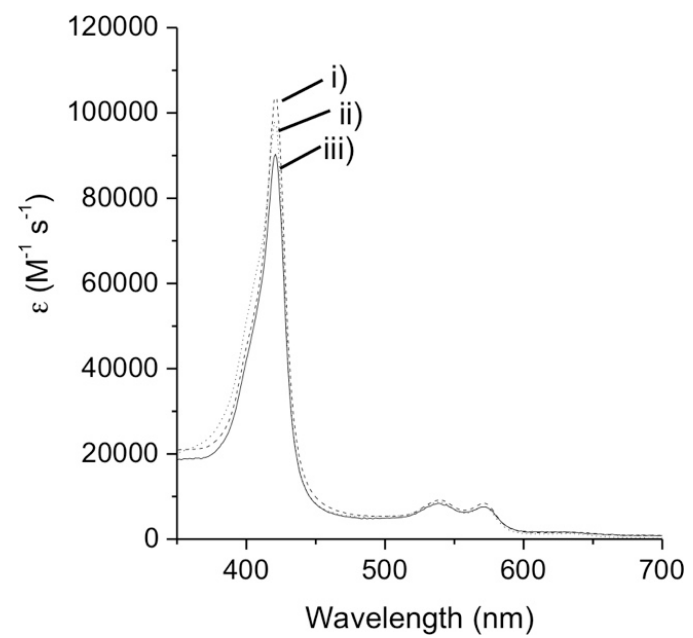

**Figure S7**

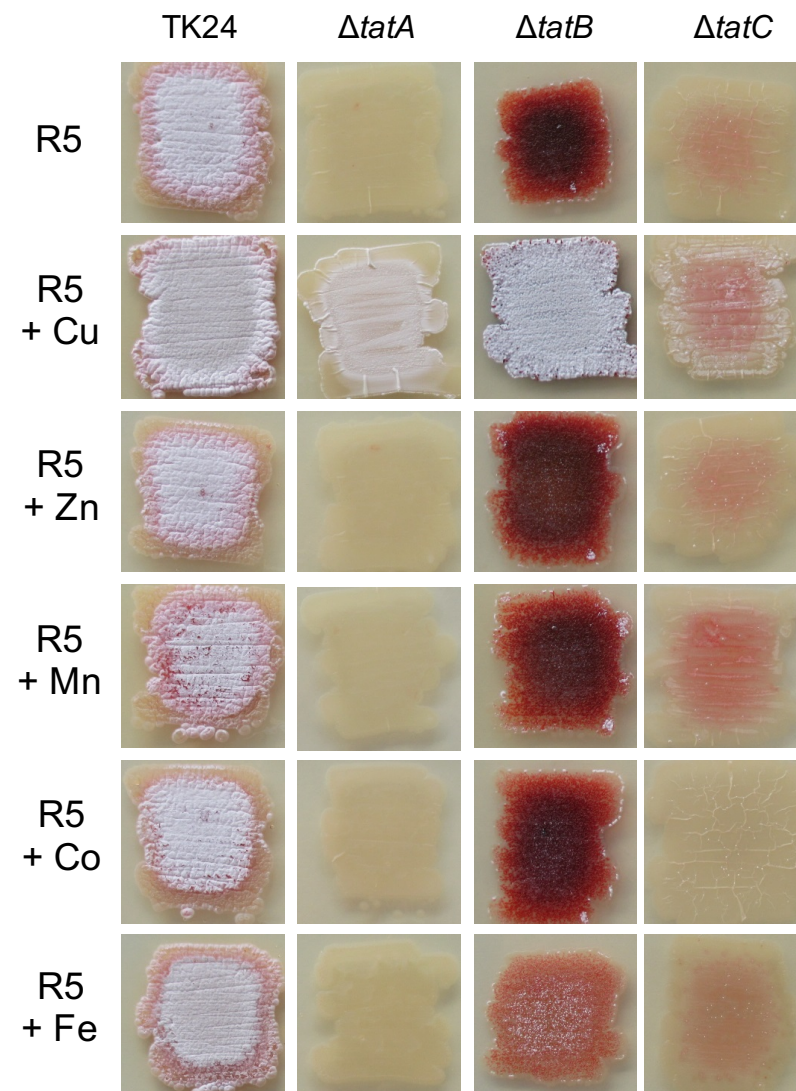

Supplement: rsob150149supp1.pdf [file rsob150149supp1.pdf]
